# Supplementary material for: Preparation of hierarchical porous-structured Fe3O4 microspheres for Fischer–Tropsch synthesis
Source: Royal Society of Chemistry journal article supplement (doi:10.1039/c5nj01690h), 2015-01-01
Supplement: c5nj01690h1.pdf [file c5nj01690h1.pdf]

Supplementary material

Electronic Supplementary Information:

New Journal of Chemistry

**Preparation of hierarchical porous-structured Fe<sub>3</sub>O<sub>4</sub> microspheres for Fischer-Tropsch synthesis**

Yulan Zhang, Longlong Ma, Tiejun Wang,\* and Xinjun Li\*

**Table S1.** Properties of fresh prepared Fe<sub>3</sub>O<sub>4</sub> microspheres.

| Catalyst | Surface area<br>(m <sup>2</sup> /g) <sup>a</sup> | Pore diameter<br>(nm) <sup>a</sup> | Microsphere size<br>(nm) <sup>b</sup> |
|----------|--------------------------------------------------|------------------------------------|---------------------------------------|
| 3PFe     | 45.4                                             | 2.39                               | 150                                   |
| 1PFe     | 41.9                                             | 3.71                               | 200                                   |
| 0PFe     | 48.1                                             | 3.70                               | 225                                   |

<sup>a</sup>Determined by BET. <sup>b</sup>Determined by SEM (Figure 2).

**Table S2.** Fe dispersion of the synthesized catalysts.

| Catalyst | CO Chemisorbed<br>(μmol/g) <sup>a</sup> | Fe dispersion<br>(%) <sup>b</sup> |
|----------|-----------------------------------------|-----------------------------------|
| 3PFe     | 969                                     | 15.0                              |
| 1PFe     | 897                                     | 13.9                              |
| 0PFe     | 527                                     | 8.2                               |

<sup>a</sup>Determined by CO-TPD. <sup>b</sup>Dispersion=2×CO chemisorbed/Fe atoms.

**Table S3** Mössbauer spectra of 1PFe at different reaction states.

| Catalysts | Phases                             | MES Parameters |              |                    |             |
|-----------|------------------------------------|----------------|--------------|--------------------|-------------|
|           |                                    | IS<br>(mm/s)   | QS<br>(mm/s) | $\Gamma$<br>(mm/s) | Area<br>(%) |
| fresh     | Fe <sub>3</sub> O <sub>4</sub> (A) | 0.32           | -0.03        | 0.55               | 57.9        |
|           | Fe <sub>3</sub> O <sub>4</sub> (B) | 0.46           | 0.00         | 0.93               | 42.1        |
| 0 h       | Fe <sub>5</sub> C <sub>2</sub> (A) | 0.00           | 0.70         | 0.20               | 6.99        |
|           | Fe <sub>5</sub> C <sub>2</sub> (B) | 0.05           | -0.16        | 0.50               | 29.5        |
|           | Fe <sub>5</sub> C <sub>2</sub> (C) | 0.29           | 0.15         | 0.32               | 20.9        |
|           | Fe <sub>3</sub> C                  | 0.32           | 0.35         | 0.30               | 22.5        |
|           | Fe <sup>3+</sup>                   | 0.30           | 1.00         | 0.48               | 20.2        |
|           |                                    |                |              |                    |             |
| 12 h      | Fe <sub>5</sub> C <sub>2</sub> (A) | 0.06           | 0.13         | 0.68               | 9.36        |
|           | Fe <sub>5</sub> C <sub>2</sub> (B) | 0.20           | -0.22        | 0.46               | 7.36        |
|           | Fe <sub>5</sub> C <sub>2</sub> (C) | 0.48           | -0.84        | 0.25               | 4.10        |
|           | Fe <sub>3</sub> O <sub>4</sub> (A) | 0.33           | 0.02         | 0.43               | 37.1        |
|           | Fe <sub>3</sub> O <sub>4</sub> (B) | 0.64           | -0.04        | 0.43               | 34.3        |
|           | Fe <sup>3+</sup>                   | 0.27           | 1.27         | 0.58               | 7.82        |
| 24 h      | Fe <sub>5</sub> C <sub>2</sub> (A) | 0.04           | -0.07        | 0.88               | 12.1        |
|           | Fe <sub>5</sub> C <sub>2</sub> (B) | 0.14           | -0.06        | 0.19               | 2.65        |
|           | Fe <sub>5</sub> C <sub>2</sub> (C) | 0.46           | -0.65        | 0.32               | 5.16        |
|           | Fe <sub>3</sub> O <sub>4</sub> (A) | 0.31           | 0.05         | 0.39               | 33.5        |
|           | Fe <sub>3</sub> O <sub>4</sub> (B) | 0.66           | -0.08        | 0.47               | 39.2        |
|           | Fe <sup>3+</sup>                   | 0.12           | 1.36         | 0.58               | 7.50        |
| 48 h      | Fe <sub>5</sub> C <sub>2</sub> (A) | 0.02           | 1.36         | 0.61               | 9.49        |
|           | Fe <sub>5</sub> C <sub>2</sub> (B) | 0.40           | -2.00        | 0.26               | 5.01        |
|           | Fe <sub>5</sub> C <sub>2</sub> (C) | 0.44           | -0.56        | 0.29               | 7.10        |
|           | Fe <sub>3</sub> O <sub>4</sub> (A) | 0.30           | -0.02        | 0.34               | 35.0        |
|           | Fe <sub>3</sub> O <sub>4</sub> (B) | 0.65           | -0.04        | 0.39               | 41.3        |
|           | Fe <sup>3+</sup>                   | 0.07           | 1.26         | 0.21               | 2.13        |

**Table S4.** Catalytic performance of 1PFe after FT reaction.

| Performance                | 24 h | 48 h |
|----------------------------|------|------|
| CO conversion              | 93.2 | 80.1 |
| Mass balance (%)           | 96.0 | 96.3 |
| Product selectivity (wt%)  |      |      |
| CH <sub>4</sub>            | 11.3 | 14.8 |
| C <sub>2-4</sub> paraffins | 6.4  | 8.3  |
| C <sub>2-4</sub> olefins   | 23.3 | 27.4 |
| C <sub>5+</sub>            | 59.0 | 49.5 |
| Olefins/paraffins (wt/wt)  |      |      |
| C <sub>2-4</sub>           | 3.64 | 3.30 |

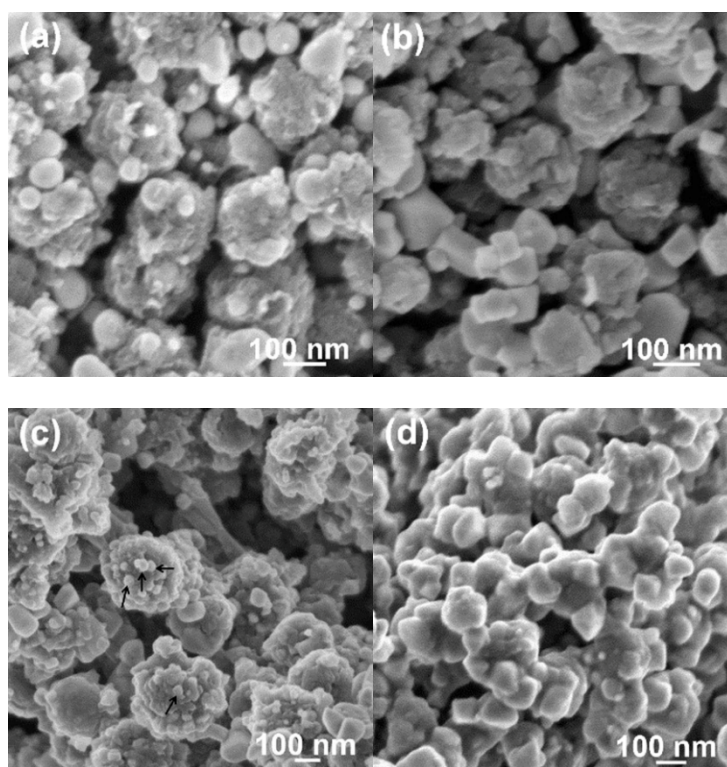**Fig. S1** SEM images of 1PFe after FT reaction for different time: (a) 0 h, (b) 12 h, (c) 24 h, and (d) 48 h.
